# Supplementary material
Source: ML conference proceedings conference paper supplement (https://proceedings.neurips.cc/paper_files/paper/2022/hash/6cc31b44d88dce8380d36e81485cd07f-Abstract.html)
Supplement: Supplementary file 1 [file 6cc31b44d88dce8380d36e81485cd07f-Supplemental-Conference.zip]

Archive with 34 entries (25 files):
- 2022NeurIPS_FigureGround_Supp.pdf
- Toy_FG_Code/
- Toy_FG_Code/README.md
- Toy_FG_Code/Test.py
- Toy_FG_Code/Train.py
- Toy_FG_Code/data_loader.py
- Toy_FG_Code/dataset/
- Toy_FG_Code/divide.py
- Toy_FG_Code/eval/
- Toy_FG_Code/eval/dataloader.py
- Toy_FG_Code/eval/eval.sh
- Toy_FG_Code/eval/evaluator.py
- Toy_FG_Code/eval/main.py
- Toy_FG_Code/eval/plot_curve.py
- Toy_FG_Code/eval/plot_curve.sh
- Toy_FG_Code/extractor.py
- Toy_FG_Code/model/
- Toy_FG_Code/model/Network.py
- Toy_FG_Code/model/Network_new.py
- Toy_FG_Code/model/Ohter_Network.py
- Toy_FG_Code/model/__init__.py
- Toy_FG_Code/model/__pycache__/
- Toy_FG_Code/model/__pycache__/__init__.cpython-36.pyc
- Toy_FG_Code/model/module_test.py
- Toy_FG_Code/model/resnet.py
- Toy_FG_Code/model/resnet_model.py
- Toy_FG_Code/pytorch_iou/
- Toy_FG_Code/pytorch_iou/__init__.py
- Toy_FG_Code/pytorch_iou/__pycache__/
- Toy_FG_Code/pytorch_iou/__pycache__/__init__.cpython-36.pyc
- Toy_FG_Code/pytorch_ssim/
- Toy_FG_Code/pytorch_ssim/__init__.py
- Toy_FG_Code/pytorch_ssim/__pycache__/
- Toy_FG_Code/pytorch_ssim/__pycache__/__init__.cpython-36.pyc
