# Supplementary material
Source: ML conference proceedings conference paper supplement (https://proceedings.neurips.cc/paper_files/paper/2022/hash/6cc31b44d88dce8380d36e81485cd07f-Abstract.html)
Supplement: Supplementary file 1 [file 6cc31b44d88dce8380d36e81485cd07f-Supplemental-Conference.zip › Toy_FG_Code/eval/dataloader.py]

from torch.utils import data
import os
from PIL import Image


class EvalDataset(data.Dataset):
    def __init__(self, pred_root, label_root):
        pred_dirs = os.listdir(pred_root)
        label_dirs = os.listdir(label_root)

        IPath = []
        LPath = []
        for idir in pred_dirs:
            if idir in label_dirs:
                IPath.append(os.path.join(pred_root, idir))
                LPath.append(os.path.join(label_root, idir))

        self.image_path = IPath
        self.label_path = LPath
        '''
        dir_name_list = []
        for idir in pred_dirs:
            if idir in label_dirs:
                pred_names = os.listdir(os.path.join(pred_root, idir))
                label_names = os.listdir(os.path.join(label_root, idir))
                for iname in pred_names:
                    if iname in label_names:
                        dir_name_list.append(os.path.join(idir, iname))

        self.image_path = list(
            map(lambda x: os.path.join(pred_root, x), dir_name_list))
        self.label_path = list(
            map(lambda x: os.path.join(label_root, x), dir_name_list))
        '''

    def __getitem__(self, item):
        pred = Image.open(self.image_path[item]).convert('L')
        gt = Image.open(self.label_path[item]).convert('L')
        if pred.size != gt.size:
            pred = pred.resize(gt.size, Image.BILINEAR)
        return pred, gt

    def __len__(self):
        return len(self.image_path)
