# Supplementary material
Source: ML conference proceedings conference paper supplement (https://proceedings.neurips.cc/paper_files/paper/2022/hash/6cc31b44d88dce8380d36e81485cd07f-Abstract.html)
Supplement: Supplementary file 1 [file 6cc31b44d88dce8380d36e81485cd07f-Supplemental-Conference.zip › Toy_FG_Code/eval/eval.sh]

CUDA_VISIBLE_DEVICES=0 python main.py --methods GICD_retest --datasets CoCA --save_dir ./Result/Detail --root_dir ../SalMaps
