# Supplementary material
Source: ML conference proceedings conference paper supplement (https://proceedings.neurips.cc/paper_files/paper/2022/hash/6cc31b44d88dce8380d36e81485cd07f-Abstract.html)
Supplement: Supplementary file 1 [file 6cc31b44d88dce8380d36e81485cd07f-Supplemental-Conference.zip › Toy_FG_Code/eval/main.py]

import torch
import torch.nn as nn
import argparse
import os.path as osp
import os
import time
from evaluator import Eval_thread
from dataloader import EvalDataset

os.environ["CUDA_VISIBLE_DEVICES"] = '0'

def main(cfg):
    if cfg.save_dir is not None:
        output_dir = cfg.save_dir
    else:
        output_dir = cfg.pred_dir
    '''
    gt_dir = osp.join(root_dir, 'gt')
    pred_dir = osp.join(root_dir, 'pred')
    '''
    gt_dir = cfg.gt_dir
    pred_dir = cfg.pred_dir

    if cfg.methods is None:
        method_names = os.listdir(pred_dir)
    else:
        method_names = cfg.methods.split('+')
    if cfg.datasets is None:
        dataset_names = os.listdir(gt_dir)
    else:
        dataset_names = cfg.datasets.split('+')

    threads = []
    for dataset in dataset_names:
        for method in method_names:
            loader = EvalDataset(osp.join(pred_dir, method, dataset), osp.join(gt_dir, dataset, 'GT'))
            thread = Eval_thread(loader, method, dataset, output_dir, cfg.cuda)
            threads.append(thread)
    for thread in threads:
        print(thread.run())


if __name__ == "__main__":
    parser = argparse.ArgumentParser()
    parser.add_argument('--methods', type=str, default=None)
    parser.add_argument('--datasets', type=str, default=None)
    parser.add_argument('--pred_dir', type=str, default='./')
    parser.add_argument('--gt_dir', type=str, default='./')
    parser.add_argument('--save_dir', type=str, default=None)
    #parser.add_argument('--cuda', type=bool, default=False)
    parser.add_argument('--cuda', action='store_false', default=True)
    config = parser.parse_args()
    t = time.time()
    main(config)
    print(time.time()-t)
