# Supplementary material
Source: ML conference proceedings conference paper supplement (https://proceedings.neurips.cc/paper_files/paper/2022/hash/6cc31b44d88dce8380d36e81485cd07f-Abstract.html)
Supplement: Supplementary file 1 [file 6cc31b44d88dce8380d36e81485cd07f-Supplemental-Conference.zip › Toy_FG_Code/model/resnet_model.py]

## code from: https://github.com/pytorch/vision/blob/master/torchvision/models/resnet.py
import torch.nn as nn
import math
import torch.utils.model_zoo as model_zoo
import torch
import torchvision

# __all__ = ['ResNet', 'resnet18', 'resnet34', 'resnet50', 'resnet101',
#            'resnet152', 'ResNet34P','ResNet50S','ResNet50P','ResNet101P']
#
# resnet18_dir = '/local/sda4/yqian3/RoadNets/resnet_model/resnet18-5c106cde.pth'
# resnet34_dir = '/local/sda4/yqian3/RoadNets/resnet_model/resnet34-333f7ec4.pth'
# resnet50_dir = '/local/sda4/yqian3/RoadNets/resnet_model/resnet50-19c8e357.pth'
# resnet101_dir = '/local/sda4/yqian3/RoadNets/resnet_model/resnet101-5d3b4d8f.pth'
#
# model_urls = {
#     'resnet18': 'https://download.pytorch.org/models/resnet18-5c106cde.pth',
#     'resnet34': 'https://download.pytorch.org/models/resnet34-333f7ec4.pth',
#     'resnet50': 'https://download.pytorch.org/models/resnet50-19c8e357.pth',
#     'resnet101': 'https://download.pytorch.org/models/resnet101-5d3b4d8f.pth',
#     'resnet152': 'https://download.pytorch.org/models/resnet152-b121ed2d.pth',
# }

def conv3x3(in_planes, out_planes, stride=1):
    "3x3 convolution with padding"
    return nn.Conv2d(in_planes, out_planes, kernel_size=3, stride=stride,
                     padding=1, bias=False)

class BasicBlock(nn.Module):
    expansion = 1

    def __init__(self, inplanes, planes, stride=1, downsample=None):
        super(BasicBlock, self).__init__()
        self.conv1 = conv3x3(inplanes, planes, stride)
        self.bn1 = nn.BatchNorm2d(planes)
        self.relu = nn.ReLU(inplace=True)
        self.conv2 = conv3x3(planes, planes)
        self.bn2 = nn.BatchNorm2d(planes)
        self.downsample = downsample
        self.stride = stride

    def forward(self, x):
        residual = x

        out = self.conv1(x)
        out = self.bn1(out)
        out = self.relu(out)

        out = self.conv2(out)
        out = self.bn2(out)

        if self.downsample is not None:
            residual = self.downsample(x)

        out += residual
        out = self.relu(out)

        return out

class BasicBlockDe(nn.Module):
    expansion = 1

    def __init__(self, inplanes, planes, stride=1, downsample=None):
        super(BasicBlockDe, self).__init__()

        self.convRes = conv3x3(inplanes,planes,stride)
        self.bnRes = nn.BatchNorm2d(planes)
        self.reluRes = nn.ReLU(inplace=True)

        self.conv1 = conv3x3(inplanes, planes, stride)
        self.bn1 = nn.BatchNorm2d(planes)
        self.relu = nn.ReLU(inplace=True)
        self.conv2 = conv3x3(planes, planes)
        self.bn2 = nn.BatchNorm2d(planes)
        self.downsample = downsample
        self.stride = stride

    def forward(self, x):
        residual = self.convRes(x)
        residual = self.bnRes(residual)
        residual = self.reluRes(residual)

        out = self.conv1(x)
        out = self.bn1(out)
        out = self.relu(out)

        out = self.conv2(out)
        out = self.bn2(out)

        if self.downsample is not None:
            residual = self.downsample(x)

        out += residual
        out = self.relu(out)

        return out


class Bottleneck(nn.Module):
    expansion = 4

    def __init__(self, inplanes, planes, stride=1, downsample=None):
        super(Bottleneck, self).__init__()
        self.conv1 = nn.Conv2d(inplanes, planes, kernel_size=1, bias=False)
        self.bn1 = nn.BatchNorm2d(planes)
        self.conv2 = nn.Conv2d(planes, planes, kernel_size=3, stride=stride,
                               padding=1, bias=False)
        self.bn2 = nn.BatchNorm2d(planes)
        self.conv3 = nn.Conv2d(planes, planes * 4, kernel_size=1, bias=False)
        self.bn3 = nn.BatchNorm2d(planes * 4)
        self.relu = nn.ReLU(inplace=True)
        self.downsample = downsample
        self.stride = stride

    def forward(self, x):
        residual = x

        out = self.conv1(x)
        out = self.bn1(out)
        out = self.relu(out)

        out = self.conv2(out)
        out = self.bn2(out)
        out = self.relu(out)

        out = self.conv3(out)
        out = self.bn3(out)

        if self.downsample is not None:
            residual = self.downsample(x)

        out += residual
        out = self.relu(out)

        return out
