# Supplementary material
Source: ML conference proceedings conference paper supplement (https://proceedings.neurips.cc/paper_files/paper/2022/hash/6cc31b44d88dce8380d36e81485cd07f-Abstract.html)
Supplement: Supplementary file 1 [file 6cc31b44d88dce8380d36e81485cd07f-Supplemental-Conference.zip › Toy_FG_Code/pytorch_iou/__init__.py]

import torch
import torch.nn.functional as F
from torch.autograd import Variable
import numpy as np

def _iou(pred, target, size_average = True):

    b = pred.shape[0]
    IoU = 0.0
    for i in range(0,b):
        #compute the IoU of the foreground
        Iand1 = torch.sum(target[i,:,:,:]*pred[i,:,:,:])
        Ior1 = torch.sum(target[i,:,:,:]) + torch.sum(pred[i,:,:,:])-Iand1
        IoU1 = Iand1/Ior1

        #IoU loss is (1-IoU1)
        IoU = IoU + (1-IoU1)

    return IoU/b

class IOU(torch.nn.Module):
    def __init__(self, size_average = True):
        super(IOU, self).__init__()
        self.size_average = size_average

    def forward(self, pred, target):

        return _iou(pred, target, self.size_average)
